# Supplementary material for: Haplotype Variation of Flowering Time Genes of Sugar Beet and Its Wild Relatives and the Impact on Life Cycle Regimes
Source: Front Plant Sci. 2018 Jan 4;8:2211. doi: 10.3389/fpls.2017.02211 (PMC5758561; doi:10.3389/fpls.2017.02211)
Supplement: Supplementary Table 2 — List of markers including primer sequences used in this study for PCR and SANGER sequencing. [file Table2.DOCX]

| Supplementary Table 2. List of markers including primer sequences used in this study for PCR and SANGER sequencing.   | Target gene | Primer name | 5’-3’ sequence forward | Primer  name | 3’-5’ sequence reverse | | --- | --- | --- | --- | --- | |  |
| --- | --- | --- | --- | --- | --- | --- |
| | *BvBBX19* | N0162F | CAACGACGACTCAAAGAGACAG | N0162R | CTCAAATTTCGGGCATAGTAATG | | --- | --- | --- | --- | --- | | NH284 | CTTCGCCCATATTGGAGATGTATC | N0169R | GTAAATGGAGATTTAAGAAGGTCC | | N0150F | ATGCATCTTATACTATGGGACCAC | N0150R | GGAACAATGCTTGCCGAATCAC | | N0160F | GATCTCAATGCTAGACCCCAAAG | NH283 | CTTCGCCCATATTGGAGATGTATC | | *BTC1* | A881 | CATACCGAAGGCGTATTCTC | A882 | GTGACTCATTATCTTGGACAG | | A894 | ACAATGAGACCTTAGTATCCG | A895 | GAGCATCAAAATGGGACTGC | | A884 | GTGCCAAATGGCATAGAAGC | A886 | CCCTAACTATCAATAGCGAGC | | A749 | CAACCAGGAAAATGATGGTCG | A750 | CAGAATCACTGAGGTTTGACAG | | *BvFT1* | NH340 | CCATCTATACTTGTCGATGACCCTT | NH351 | ATTGAAATGGAGAGGTGGAATTGG | | NH338 | GGAACACATCAAAAGGTGAGAAATC | NH339 | CTTCCATGCCCCACTACATCTTG | | NH334 | GTCTCTGGAAGTTTCTTTATCGATTGG | NH335 | TTAGATAGTGAAGTATTCCTTAGCTTTCTAGC | | *BvFT2* | NH362 | CGATCATGCCTAGAGCACCAAGA | NH356 | ATCACTAAAATTATCTACTCACCAG | | FT2h | CTAGTTGTCTCCCATGTTGCTAC | FT2e | AGCAACAATGCTCTTCAATGGCC | | NH358 | GTGTAGTAAATTTACAACCTTCTTC | NH357 | GTGTGTAGGCCAAGAAGTTGTCTG | | |
